# Supplementary material
Source: PubMed Central journal article supplement (PMC5921528)
Supplement: pcp-2017-e-00178-file011_pcx108.pdf [file pcp-2017-e-00178-file011_pcx108.pdf]

**Fig S1**

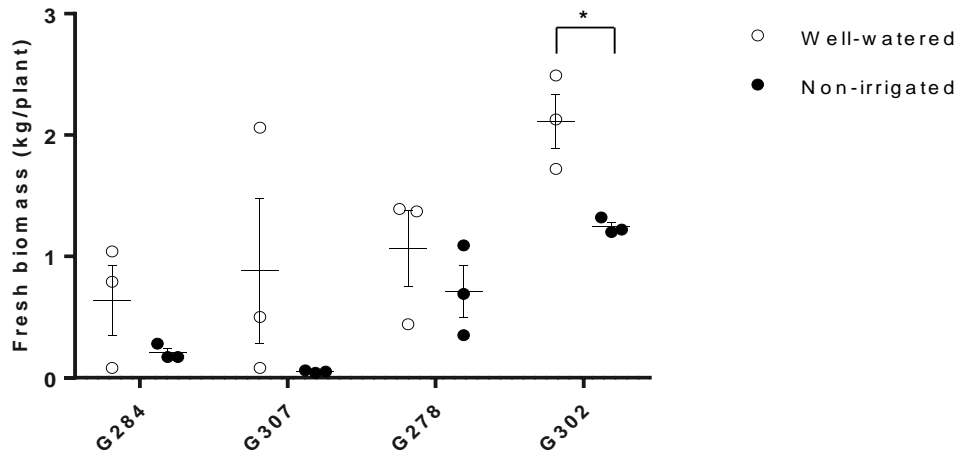

**S1) Fresh biomass of field-grown Spring lines under well-watered (white symbols) and non-irrigated (black symbols) conditions.** Plants were harvested after seed-set and fresh shoot mass was recorded. Statistical values for differences between treatments were calculated using a two-way ANOVA followed by Fisher's LSD test. ( $P < 0.05$ ;  $n=3$ )

Fig S2

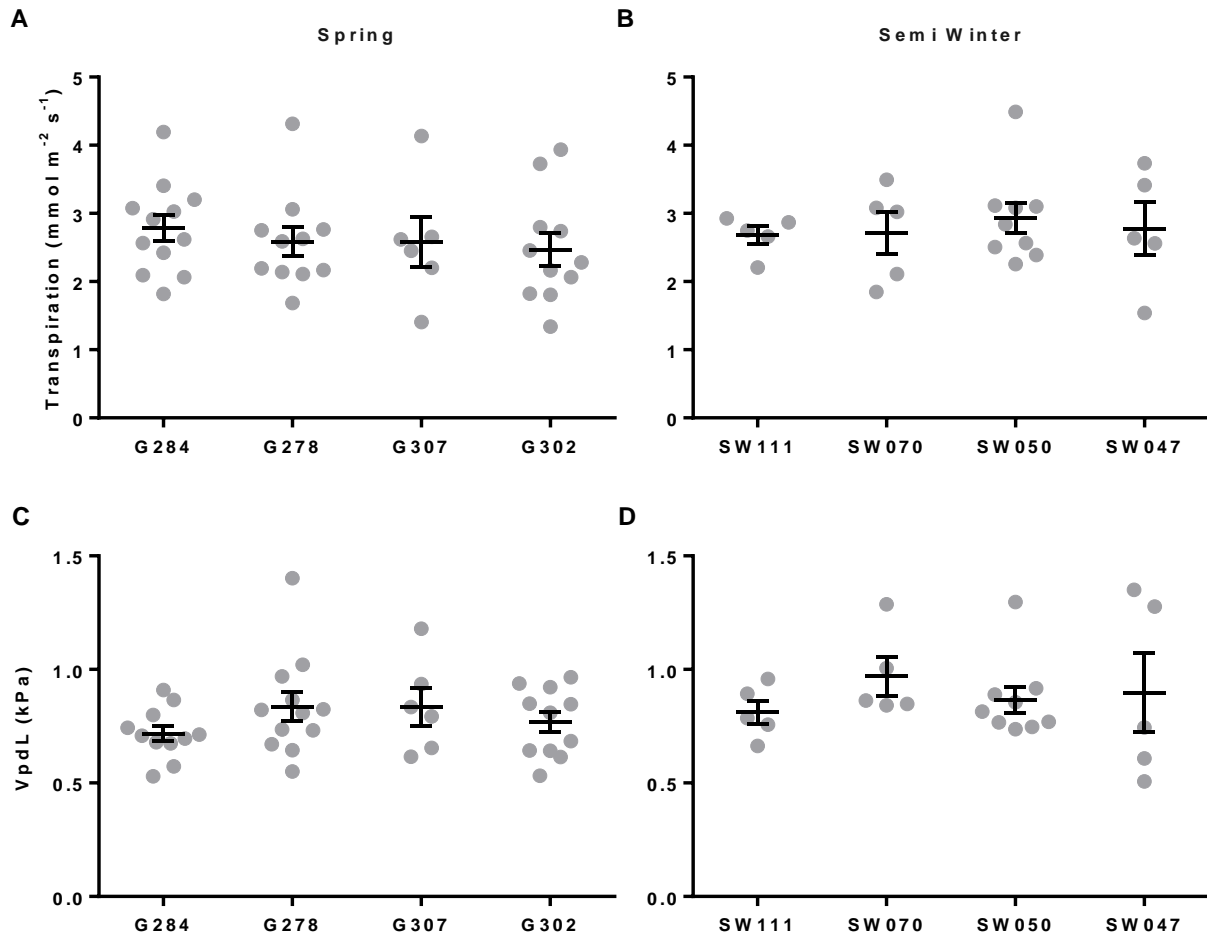

**S2) Transpiration rates of (A) Spring and (B) Semi-Winter accessions.** Error bars denote s.e.m. Statistical values for differences within categories were calculated using a one-way ANOVA followed by Tukey's multiple comparisons test and showed no significant differences between accessions.

**Fig S3**

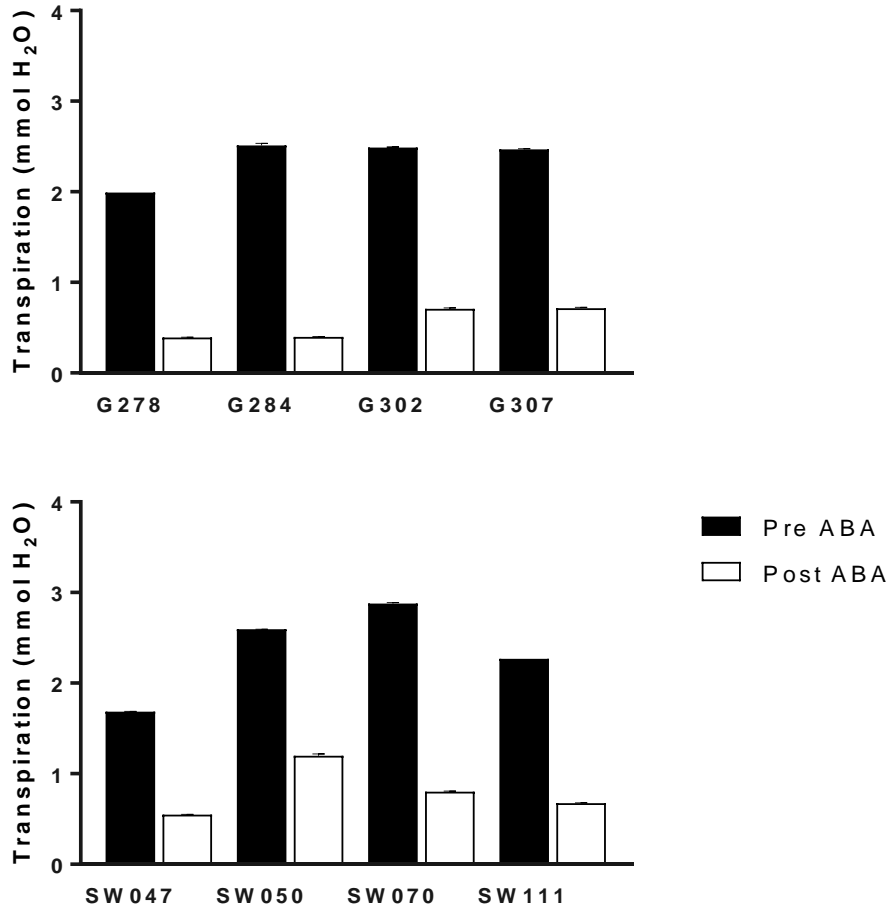

**S3) Transpiration rates in response to exogenous ABA.** Bars represent average of 10 minutes of measurements prior to ABA addition (black bars) and 10 minutes of low transpiration data after ABA addition (white bars). (means  $\pm$  s.e.m.; n=5). No significant differences were found between post ABA values amongst accessions. Statistical values for differences within categories were calculated using a two-way ANOVA followed by Sidak's multiple comparisons test.
